# Supplementary material for: Stroke volume variation for predicting responsiveness to fluid therapy in patients undergoing cardiac and thoracic surgery: a systematic review and meta-analysis
Source: PubMed Central journal article supplement — BMJ Open. 2022 May 17;12(5):e051112. doi: 10.1136/bmjopen-2021-051112 (PMC9119189; doi:10.1136/bmjopen-2021-051112), 2022-05-17
Supplement: bmjopen-2021-051112supp001.pdf [file bmjopen-2021-051112supp001.pdf]

| Supplementary Table1 The results of all the included studies. |      |    |    |    |    |                |                |         |      |                         |
|---------------------------------------------------------------|------|----|----|----|----|----------------|----------------|---------|------|-------------------------|
| Study                                                         | Year | TP | FP | TN | FN | Sensitivity(%) | Specificity(%) | Cut-off | AUC  | Correlation coefficient |
| Thoracic surgery                                              |      |    |    |    |    |                |                |         |      |                         |
| Kang et al <sup>11</sup>                                      | 2016 | 33 | 13 | 4  | 25 | 86.8           | 65.8           | 3.5     | 0.82 | NA                      |
| Fu et al <sup>12</sup>                                        | 2015 | 8  | 6  | 4  | 6  | 66.7           | 50.0           | 8.5     | 0.77 | 0.41                    |
| Fu et al <sup>12</sup>                                        | 2015 | 8  | 3  | 2  | 7  | 80.0           | 70.0           | 8.5     | 0.78 | 0.68                    |
| Fu et al <sup>13</sup>                                        | 2014 | 8  | 5  | 8  | 9  | 50.0           | 64.0           | NA      | 0.51 | -0.17                   |
| Miñana et al <sup>14</sup>                                    | 2020 | 8  | 3  | 14 | 14 | 36.4           | 82.4           | 8.0     | 0.47 | NA                      |
| Jeony et al <sup>15</sup>                                     | 2017 | 26 | 39 | 3  | 11 | 89.7           | 22.0           | NA      | 0.53 | NA                      |
| Suehiro et al <sup>16</sup>                                   | 2010 | 14 | 1  | 3  | 13 | 82.4           | 92.3           | 10.5    | 0.90 | 0.87                    |
| Suehiro et al <sup>16</sup>                                   | 2011 | 13 | 9  | 9  | 7  | 58.3           | 44.0           | 10.0    | 0.65 | NA                      |
| Suehiro et al <sup>17</sup>                                   | 2011 | 18 | 4  | 5  | 8  | 85.7           | 66.7           | 10.5    | 0.78 | NA                      |
| Cardiac surgery                                               |      |    |    |    |    |                |                |         |      |                         |
| Kim et al <sup>18</sup>                                       | 2013 | 16 | 4  | 5  | 8  | 76.0           | 67.0           | 13.0    | 0.81 | 0.57                    |

|                                               |      |    |   |    |    |       |       |      |      |       |
|-----------------------------------------------|------|----|---|----|----|-------|-------|------|------|-------|
| Monte<br>nij et<br>al <sup>19</sup>           | 2016 | 5  | 4 | 4  | 9  | 56.0  | 69.0  | 10.0 | 0.70 | 0.32  |
| Broch<br>et al <sup>20</sup>                  | 2011 | 30 | 9 | 16 | 28 | 65.0  | 76.0  | 12.0 | 0.72 | 0.57  |
| Broch<br>et al <sup>21</sup>                  | 2012 | 35 | 9 | 19 | 31 | 65.0  | 77.0  | 11.0 | 0.77 | 0.62  |
| Hofer<br>et al <sup>22</sup>                  | 2005 | 17 | 5 | 6  | 12 | 74.0  | 71.0  | 12.5 | 0.82 | -0.66 |
| Presi<br>man<br>et al <sup>23</sup>           | 2005 | 26 | 7 | 6  | 32 | 81.0  | 82.0  | NA   | 0.58 | 0.58  |
| Haas<br>et al <sup>24</sup>                   | 2012 | 4  | 5 | 0  | 13 | 100.0 | 72.2  | 11.0 | 0.87 | NA    |
| Cann<br>esson<br>et al <sup>25</sup>          | 2009 | 14 | 1 | 3  | 7  | 82.0  | 88.0  | 10.0 | 0.87 | NA    |
| ICU after<br>cardiac<br>surgery               |      |    |   |    |    |       |       |      |      |       |
| Fisch<br>er et<br>al <sup>26</sup>            | 2013 | 8  | 1 | 19 | 9  | 30.0  | 90.0  | NA   | 0.50 | NA    |
| Hofer<br>et al <sup>27</sup><br>(PiCC<br>O)   | 2008 | 20 | 4 | 3  | 13 | 87.0  | 76.0  | 12.1 | 0.86 | 0.70  |
| Hofer<br>et al <sup>27</sup><br>(Vigil<br>eo) | 2008 | 21 | 3 | 2  | 14 | 91.0  | 83.0  | 9.6  | 0.82 | 0.65  |
| Geert<br>s et<br>al <sup>28</sup>             | 2011 | 7  | 0 | 3  | 10 | 70.0  | 100.0 | 7.3  | 0.90 | 0.67  |
| Kang                                          | 2014 | 25 | 4 | 2  | 23 | 92.3  | 84.0  | 13.5 | 0.94 | NA    |

|                                   |      |    |   |   |   |       |      |     |      |      |
|-----------------------------------|------|----|---|---|---|-------|------|-----|------|------|
| et al <sup>29</sup>               |      |    |   |   |   |       |      |     |      |      |
| De<br>Waale<br>t al <sup>30</sup> | 2009 | 11 | 3 | 0 | 8 | 100.0 | 78.0 | 8.0 | 0.91 | 0.75 |

TP, true positive; FP, false positive; TN, true negative; FN, false negative; AUC, area under the curve
