# Supplementary material for: Stroke volume variation for predicting responsiveness to fluid therapy in patients undergoing cardiac and thoracic surgery: a systematic review and meta-analysis
Source: PubMed Central journal article supplement — BMJ Open. 2022 May 17;12(5):e051112. doi: 10.1136/bmjopen-2021-051112 (PMC9119189; doi:10.1136/bmjopen-2021-051112), 2022-05-17
Supplement: bmjopen-2021-051112supp002.pdf [file bmjopen-2021-051112supp002.pdf]

**Pubmed:**

("thoracic procedures"[tw] OR "thoracic operation"[tw] OR "chest surgery"[tw] OR "thoracic surgical procedures"[tw] OR "operation on chest"[tw] OR "major thoracic surgery"[tw] OR "Thoracic Surgery"[Mesh] OR "heart operation"[tw] OR "cardiac operations"[tw] OR "open heart surgery"[tw] OR "cardiac surgical procedures"[tw] OR "cardiac operation"[tw] OR "heart surgical"[tw] OR "Cardiac Surgical Procedures"[Mesh] OR "critical care unit"[tw] OR "intensive care"[tw] OR "intensive care unite"[tw] OR "intensive care unit"[tw] OR "Recovery Room"[tw] OR "Respiratory Care Units"[tw] OR "Intensive Care Units"[Mesh]) AND ("evaluation"[tw] OR "predication"[tw] OR "predictor"[tw] OR "Physiological Monitoring"[tw] OR "Monitoring, Physiologic"[Mesh]) AND ("fluid infusion"[tw] OR "fluid challenge"[tw] OR "fluid therapy"[tw] OR "passive leg raising"[tw] OR "reaction"[tw] OR "response"[tw] OR "responsiveness"[tw]) AND ("SVV"[tw] OR "stroke volume variation"[tw] OR "volume variation"[tw] OR "cardiac output variation"[tw] OR "stroke volume"[Mesh])

220

**Web of Science:**

TS=(("thoracic procedures" OR "thoracic operation" OR "chest surgery" OR "thoracic surgical procedures" OR "operation on chest" OR "major thoracic surgery" OR "Thoracic Surgery" OR "heart operation" OR "cardiac operations" OR "open heart surgery" OR "cardiac surgical procedures" OR "cardiac operation" OR "heart surgical" OR "Cardiac Surgical Procedures" OR "critical care unit" OR "intensive care" OR "intensive care unite" OR "intensive care unit" OR "Recovery Room" OR "Respiratory Care Units" OR "Intensive Care Units") AND ("evaluation" OR "predication" OR "predictor" OR "Physiological Monitoring" OR "Monitoring, Physiologic") AND ("fluid infusion" OR "fluid challenge" OR "fluid therapy" OR "passive leg raising" OR "reaction" OR "response" OR "responsiveness") AND ("SVV" OR "stroke volume variation" OR "volume variation" OR "cardiac output variation" OR "stroke volume"))

218

**Cochrane**

(thoracic NEXT procedures\* OR thoracic NEXT operation\* OR chest NEXT surgery\* OR thoracic NEXT surgical NEXT procedures\* OR operation NEXT on NEXT chest\* OR major NEXT thoracic NEXT surgery\* OR Thoracic NEXT Surgery\* OR heart NEXT operation\* OR cardiac NEXT operations\* OR open NEXT heart NEXT surgery\* OR cardiac NEXT surgical NEXT procedures\* OR cardiac NEXT operation\* OR heart NEXT surgical\* OR Cardiac NEXT Surgical NEXT Procedures\* OR critical NEXT care NEXT unit\* OR intensive NEXT care\* OR intensive NEXT care NEXT unite\* OR intensive NEXT care NEXT unit\* OR Recovery NEXT Room\* OR Respiratory NEXT Care NEXT Units\* OR Intensive NEXT Care NEXT Units) AND (evaluation\* OR predication\* OR

predictor\* OR Physiological NEXT Monitoring\* OR Monitoring, Physiologic\*) AND (fluid NEXT infusion\* OR fluid NEXT challenge\* OR fluid NEXT therapy\* OR passive NEXT leg NEXT raising\* OR reaction\* OR response\* OR responsiveness\*) AND (SVV\* OR stroke NEXT volume NEXT variation\* OR volume NEXT variation\* OR cardiac NEXT output NEXT variation\* OR stroke NEXT volume\*)

34

**Embase:**

("thoracic procedures\*" OR "thoracic operation\*" OR "chest surgery\*" OR "thoracic surgical procedures\*" OR "operation on chest\*" OR "major thoracic surgery\*" OR "Thoracic Surgery\*" OR "heart operation\*" OR "cardiac operations\*" OR "open heart surgery\*" OR "cardiac surgical procedures\*" OR "cardiac operation\*" OR "heart surgical\*" OR "Cardiac Surgical Procedures\*" OR "critical care unit\*" OR "intensive care\*" OR "intensive care unite\*" OR "intensive care unit\*" OR "Recovery Room\*" OR "Respiratory Care Units\*" OR "Intensive Care Units") AND ("evaluation\*" OR "predication\*" OR "predictor\*" OR "Physiological Monitoring\*" OR "Monitoring, Physiologic\*") AND ("fluid infusion\*" OR "fluid challenge\*" OR "fluid therapy\*" OR "passive leg raising\*" OR "reaction\*" OR "response\*" OR "responsiveness\*") AND ("SVV\*" OR "stroke volume variation\*" OR "volume variation\*" OR "cardiac output variation\*" OR "stroke volume\*")

323
